# Supplementary material for: Bulk-independent surface oxide composition controls the electrochemical performance of high-entropy alloys
Source: Royal Society of Chemistry journal article supplement (doi:10.1039/d4ta03619k), 2024-01-01
Supplement: d4ta03619k1.pdf [file d4ta03619k1.pdf]

## Supporting Information

### **Bulk-independent surface oxide composition controls the electrochemical performance of high-entropy alloys**

Matthias Kogler<sup>a,b</sup>, Matteo Olgiati<sup>a,b</sup>, Markus Ostermann<sup>b</sup>, Philipp Rachle<sup>a</sup>, Soniya Gahlawat<sup>a,b</sup>, Markus Valtiner<sup>\*a,b</sup>, and Christian M. Pichler<sup>\*a,b</sup>

<sup>a</sup> Institute of Applied Physics, Vienna University of Technology, 1040 Vienna, Austria

<sup>b</sup> Center for Electrochemical Surface Technology GmbH, 2700 Wr. Neustadt, Austria

Table S1: SEM-EDX analysis of Ni-based alloys. Composition considering only metal components.

| <b>Sample</b> | <b>Cr (at%)</b> | <b>Mn (at%)</b> | <b>Fe (at%)</b> | <b>Co (at%)</b> | <b>Ni (at%)</b> |
|---------------|-----------------|-----------------|-----------------|-----------------|-----------------|
| CrMnFeCoNi    | 20.3 ± 2.7      | 20.3 ± 2.6      | 20.5 ± 2.9      | 19.9 ± 3.1      | 18.9 ± 3.5      |
| CrFeCoNi      | 25.5 ± 2.7      | --              | 25.5 ± 2.9      | 25 ± 2.8        | 24.1 ± 3.1      |
| CrFeNi        | 34.2 ± 2.4      | --              | 33.7 ± 2.9      | --              | 32.1 ± 3.1      |
| CrCoNi        | 33.9 ± 2.5      | --              | --              | 33.7 ± 2.7      | 32.4 ± 2.7      |
| FeCoNi        | --              | --              | 33.9 ± 2.5      | 33.7 ± 2.3      | 32.4 ± 2.8      |
| CrNi          | 52.4 ± 2        | --              | --              | --              | 47.6 ± 2.6      |
| FeNi          | --              | --              | 52 ± 2.3        | --              | 48 ± 2.7        |
| CoNi          | --              | --              | --              | 50.3 ± 2.1      | 49.7 ± 2.2      |

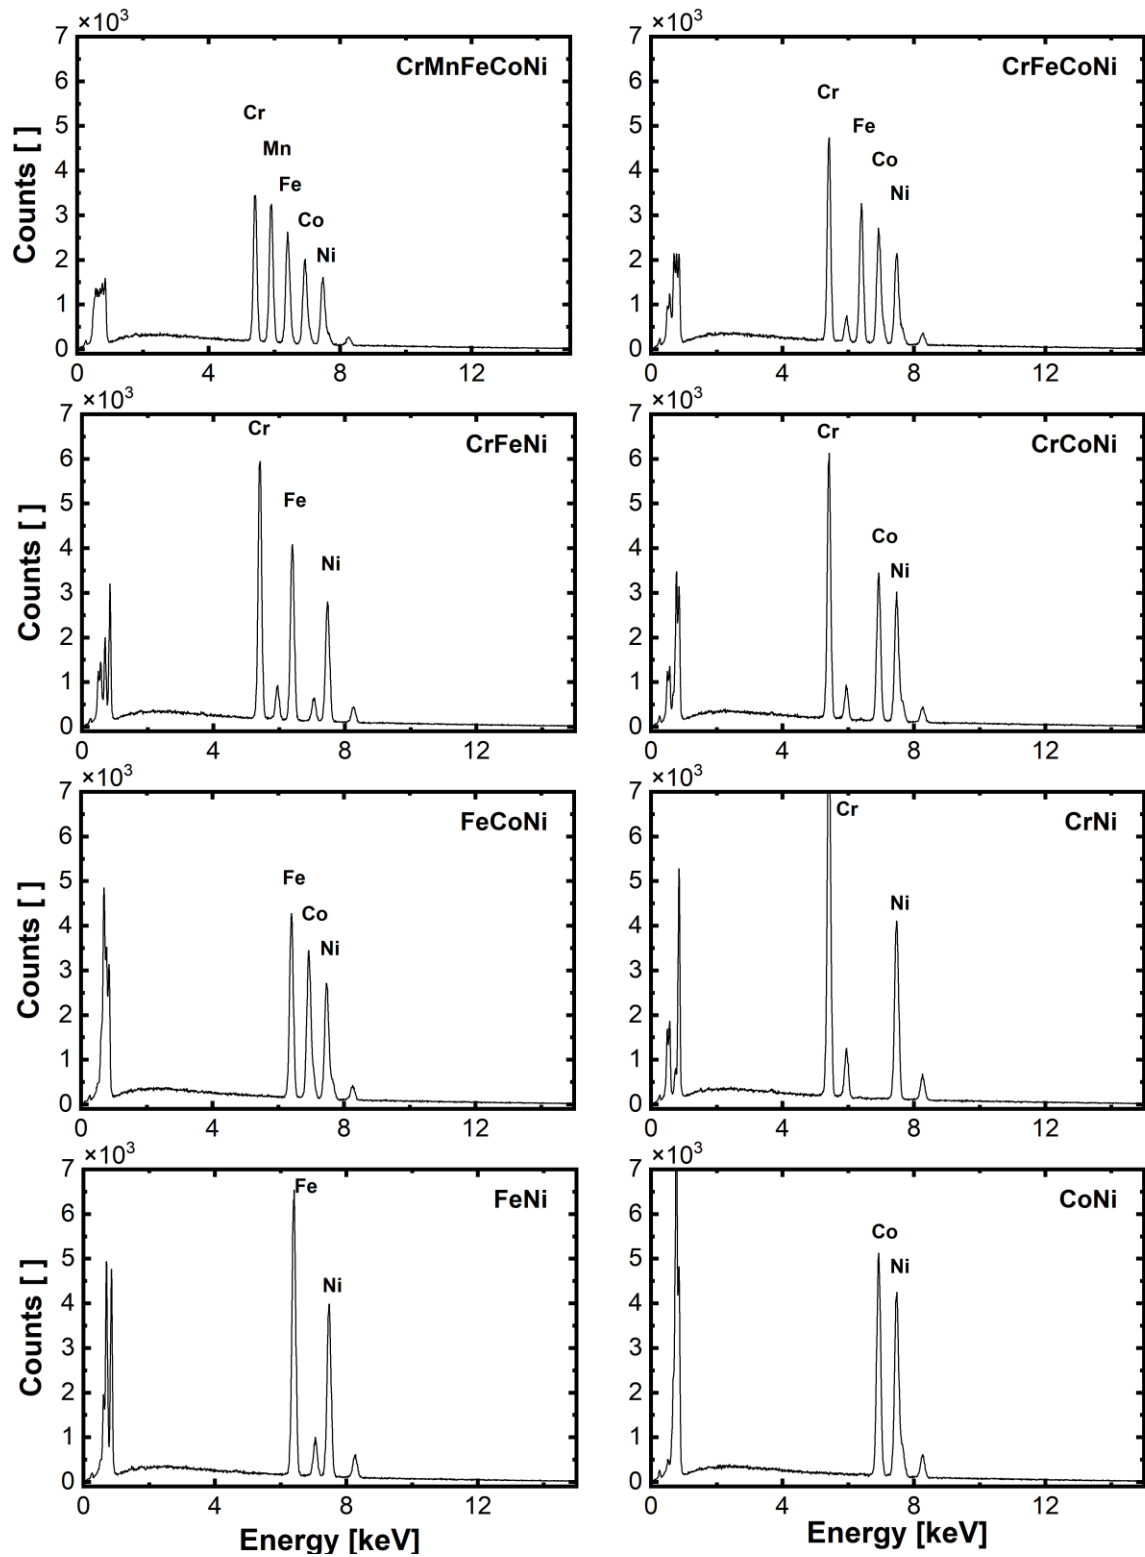

Figure S1: SEM-EDX spectra for Ni-based multi-metallic alloys with assignment of peaks for Cr, Mn, Fe, Co, Ni.

Table S2: XRF analysis of Ni-based alloys.

| Sample     | Cr (at%)   | Mn (at%) | Fe (at%)   | Co (at%)   | Ni (at%)   |
|------------|------------|----------|------------|------------|------------|
| CrMnFeCoNi | 18.8       | 18.9     | 20.9       | 20.2       | 21.2       |
| CrFeCoNi   | 23.6 ± 0.2 | --       | 24.9 ± 0.3 | 25.9 ± 0.3 | 25.6 ± 0.3 |
| CrFeNi     | 32.0 ± 0.3 | --       | 33.8 ± 0.3 | --         | 34.2 ± 0.3 |
| CrCoNi     | 30.8 ± 0.3 | --       | --         | 34.4 ± 0.3 | 34.8 ± 0.3 |
| FeCoNi     | --         | --       | 32.2 ± 0.2 | 33.8 ± 0.2 | 34.0 ± 0.3 |
| CrNi       | 47.2 ± 0.3 | --       | --         | --         | 52.8 ± 0.4 |
| FeNi       | --         | --       | 49.2 ± 0.3 | --         | 50.8 ± 0.4 |
| CoNi       | --         | --       | --         | 50.4 ± 0.3 | 49.6 ± 0.3 |

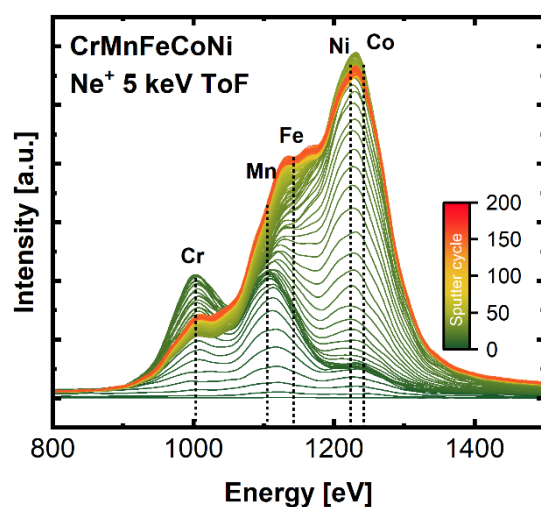

Figure S2: Partial spectra of LEIS sputter profile of CrMnFeCoNi native surface. Peak positions established from reference measurements on monometallic standards are indicated for each element.

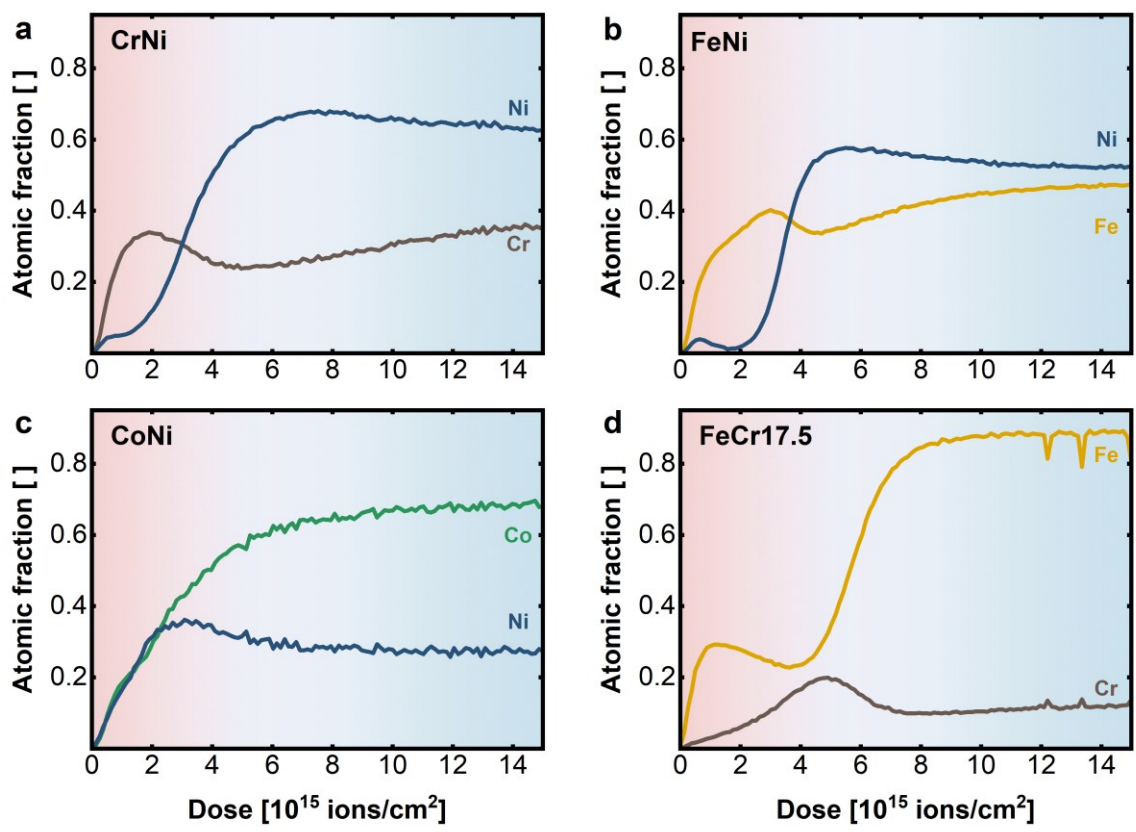

Figure S3: LEIS sputter depth profiles of (a) CrNi, (b) FeNi, (c) CoNi and (d) FeCr17.5.

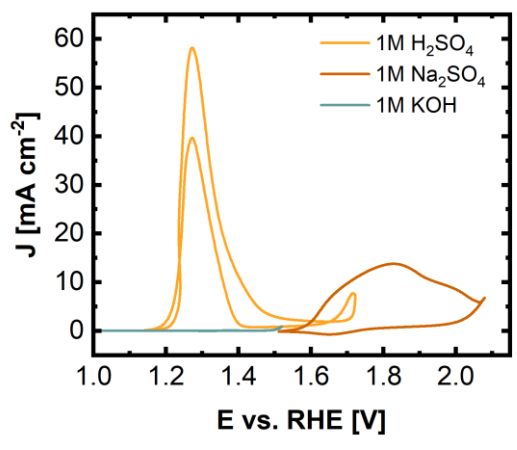

Figure S4: Cyclic voltammograms of CrMnFeCoNi in different conditions at a scan rate of 20 mV s $^{-1}$

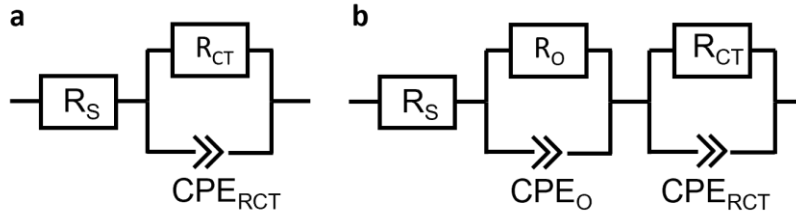

Figure S5: Equivalent circuit used for fitting electrochemical impedance spectra.  $R_s$  denotes the electrolyte resistance,  $R_o$  the oxide film resistance and  $R_{CT}$  the charge transfer resistance.  $CPE_o$  and  $CPE_{RCT}$  represent the respective constant phase elements.

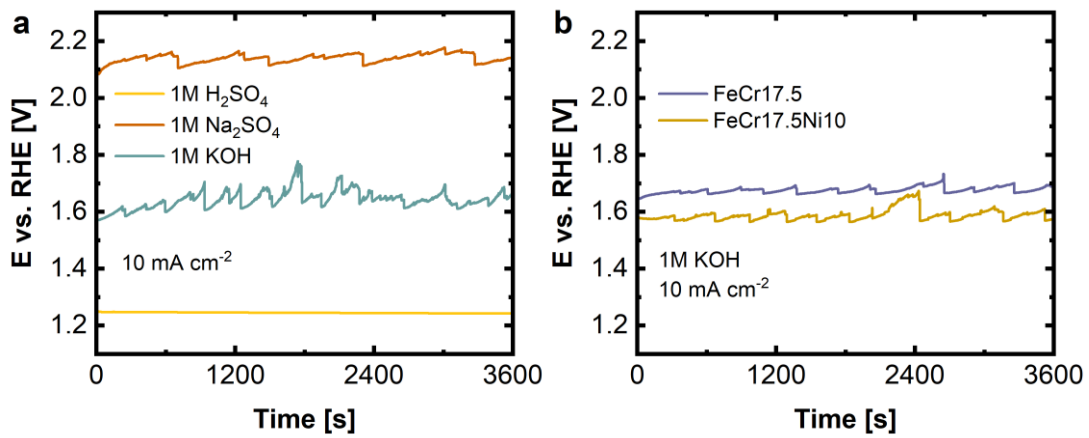

Figure S6: Chronopotentiometric measurements of (a) CrMnFeCoNi in different electrolytes and (b) FeCr17.5, FeCr17.5Ni10 in 1 M KOH. Measurements were performed at a constant current density of  $10 \text{ mA cm}^{-2}$ .

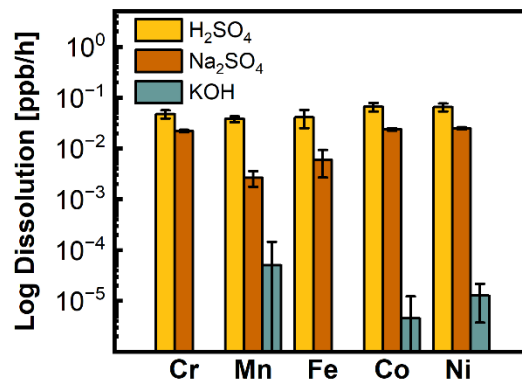

Figure S7: Results of the ICP-MS measurements of the electrolyte after chronopotentiometric (CP) measurements of CrMnFeCoNi (in solutions of 1 mM H<sub>2</sub>SO<sub>4</sub>, 1 mM Na<sub>2</sub>SO<sub>4</sub> and 1 mM KOH). Metal dissolution is given in dissolution per hour of CP duration.

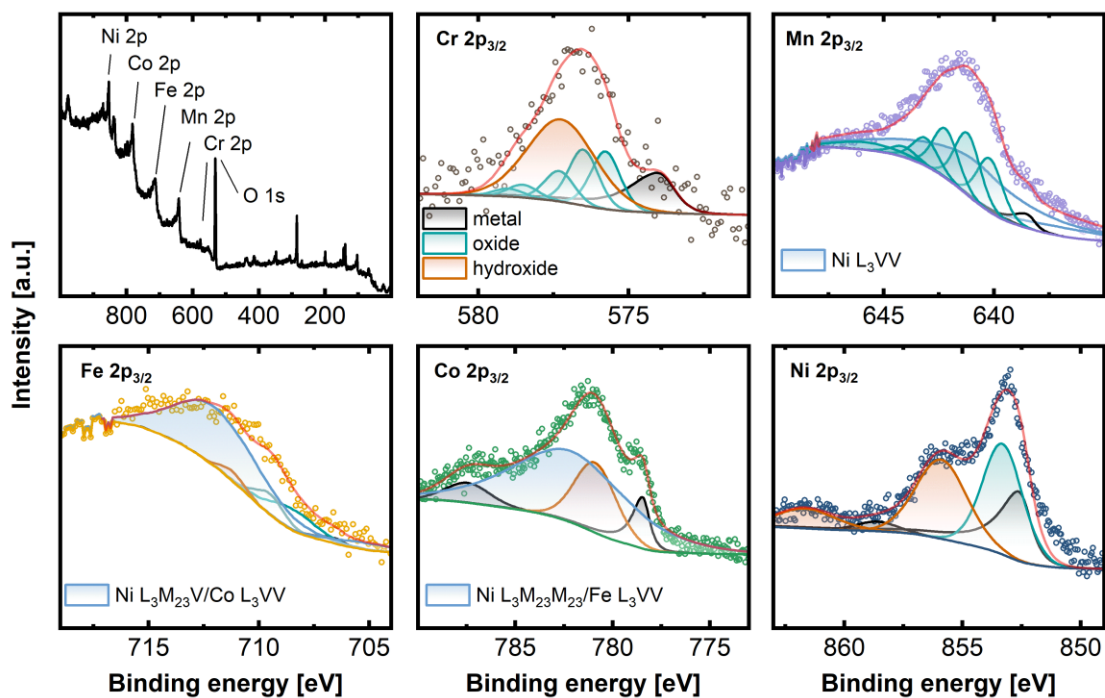

Figure S8: XPS measurements of CrMnFeCoNi after chronopotentiometric treatment for 5.5 h in 1 M KOH at a constant current density of  $10 \text{ mA cm}^{-2}$ . Recorded a sputter time of 10 s. Survey spectrum as well as high-resolution spectra of the  $2p_{3/2}$  region of Cr, Mn, Fe, Co and Ni.

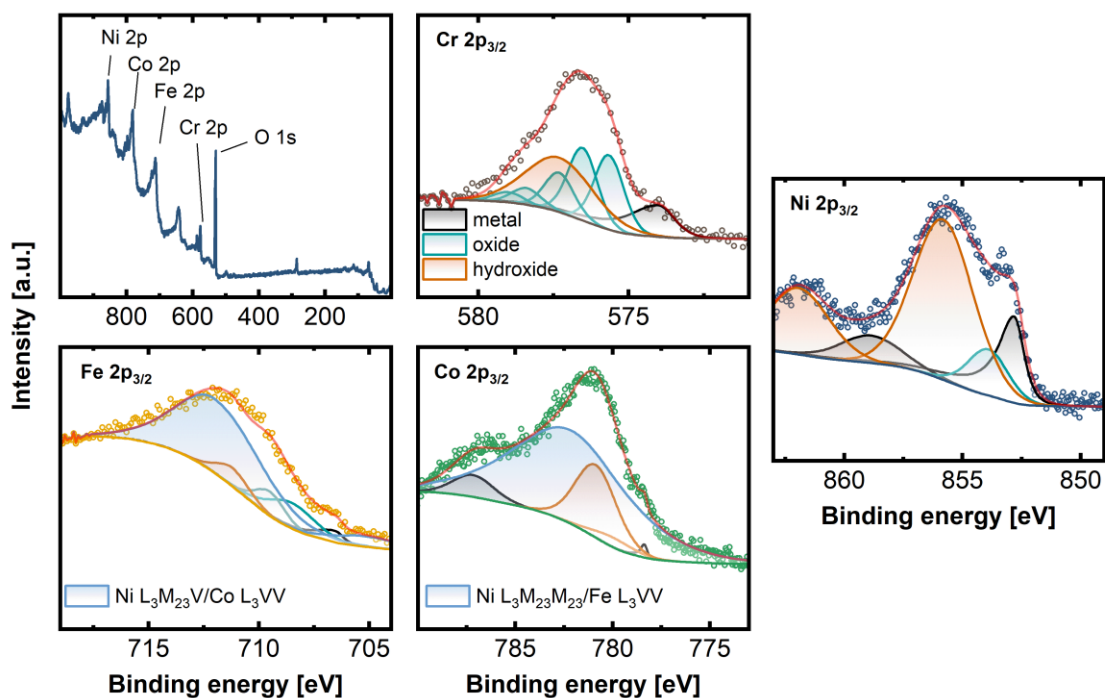

Figure S9: XPS measurements of CrFeCoNi after chronopotentiometric treatment for 0.25 h in 1 M KOH at a constant current density of  $10 \text{ mA cm}^{-2}$ . Recorded a sputter time of 10 s. Survey spectrum as well as high-resolution spectra of the  $2p_{3/2}$  region of Cr, Mn, Fe, Co and Ni.

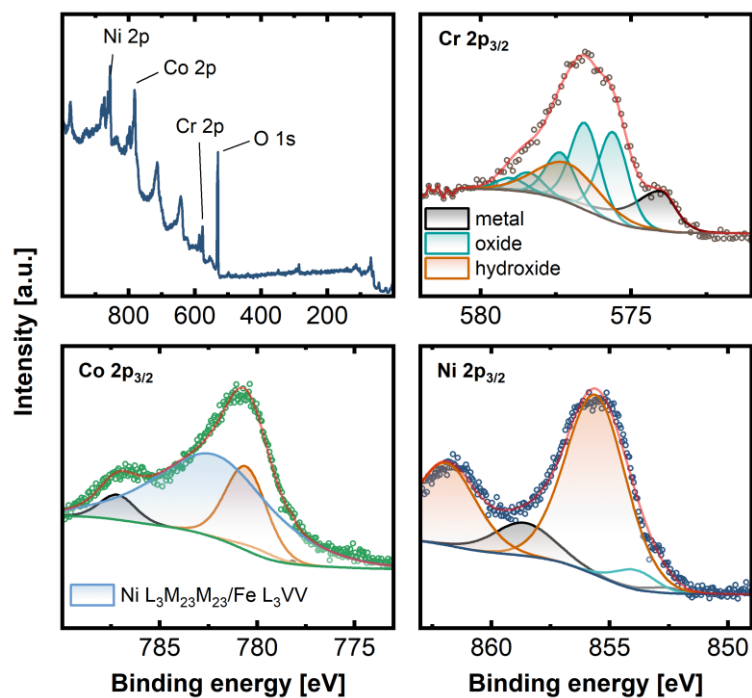

Figure S10: XPS measurements of CrCoNi after chronopotentiometric treatment for 0.25 h in 1 M KOH at a constant current density of 10 mA cm<sup>-2</sup>. Recorded a sputter time of 10 s. Survey spectrum as well as high-resolution spectra of the 2p<sub>3/2</sub> region of Cr, Mn, Fe, Co and Ni.

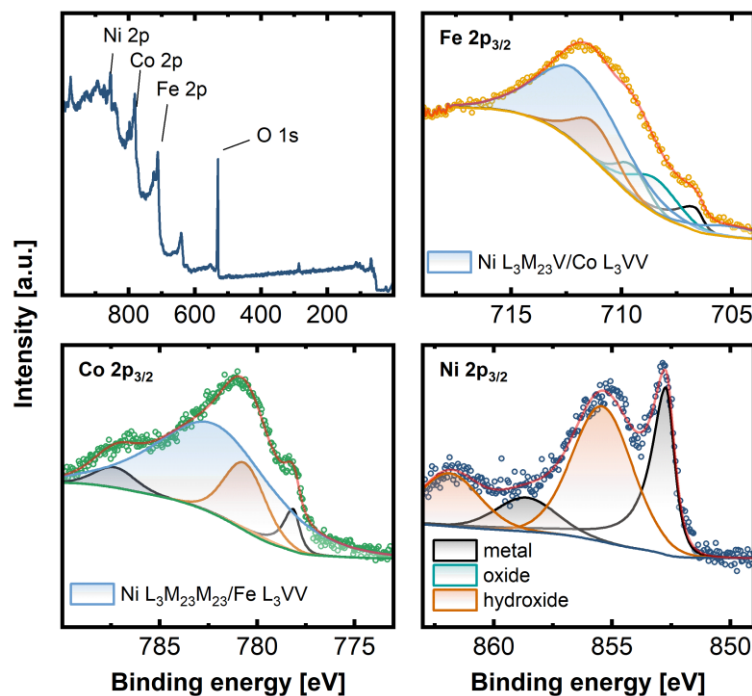

Figure S11: XPS measurements of FeCoNi after chronopotentiometric treatment for 0.25 h in 1 M KOH at a constant current density of 10 mA cm<sup>-2</sup>. Recorded a sputter time of 10 s. Survey spectrum as well as high-resolution spectra of Cr, Mn, Fe, Co and Ni.

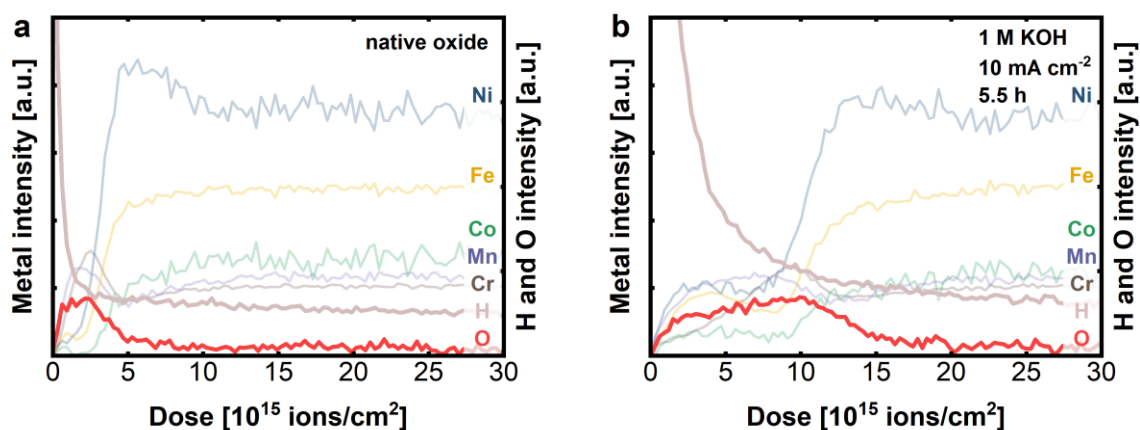

Figure S12: LEIS sputter depth profiles of CrMnFeCoNi on (a) the native surface and (b) after chronopotentiometric treatment for 5.5 h in 1 M KOH at a constant current density of 10 mA cm $^{-2}$ . Graphs show qualitative elemental profiles for metals as well as O and H, scaled on different y-axis for better clarity. Metal signals were obtained from deconvolution of Ne 5 keV ToF measurements, whereas O was obtained from He 3 keV ToF spectra. H profile was obtained from He 3 keV ToF measurements, reconstructed from the light sputtered ions signal.

Table S3: EIS fitting parameters using the equivalent circuit shown in Fig. S5a (a) and Fig. S5b (b), respectively.

**a**

| Sample       | $R_s$ [Ohm] | Error [%] | $R_{CT}$ [Ohm] | Error [%] |
|--------------|-------------|-----------|----------------|-----------|
| CrMnFeCoNi   | 33.98       | 2.549     | 334.8          | 1.835     |
| CrFeCoNi     | 62.48       | 1.677     | 415.8          | 1.794     |
| CrFeNi       | 59.08       | 1.335     | 325.2          | 1.624     |
| CrCoNi       | 80.28       | 1.035     | 422.6          | 1.198     |
| FeCoNi       | 32.71       | 1.875     | 781.3          | 1.599     |
| FeNi         | 64.54       | 1.415     | 346.4          | 1.116     |
| CoNi         | 81.2        | 1.439     | 207.7          | 1.858     |
| FeCr17.5Ni10 | 38.7        | 1.773     | 275.7          | 1.33      |

**b**

| Sample   | $R_s$ [Ohm] | Error [%] | $R_o$ [Ohm] | Error [%] | $R_{CT}$ [Ohm] | Error [%] |
|----------|-------------|-----------|-------------|-----------|----------------|-----------|
| CrNi     | 34.98       | 0.726     | 42.85       | 14.96     | 125.6          | 5.482     |
| FeCr17.5 | 30.75       | 2.812     | 76.39       | 8.46      | 975.5          | 0.982     |



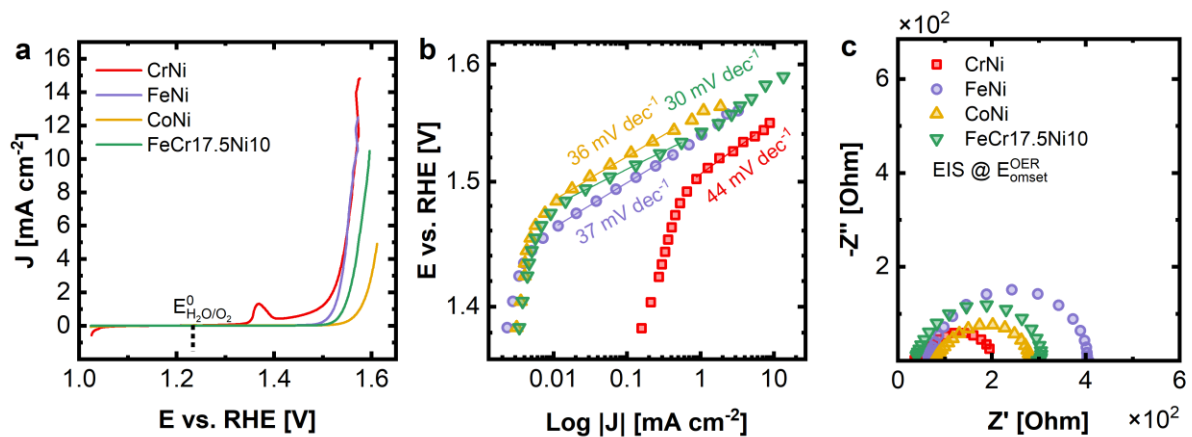

Figure S13: Electrochemical characterization of CrNi, FeNi, CoNi and FeCr17.5Ni10. (a) LSV experiments, (b) Tafel plots with obtained Tafel slopes, (c) EIS spectra performed at the respective OER onset potential.
